# Supplementary material for: Recombination Events Shape the Genomic Evolution of Infectious Bronchitis Virus in Europe
Source: MDPI journal article supplement (doi:10.3390/v13040535), 2021-03-24

# ORF 1a

ML

NJ

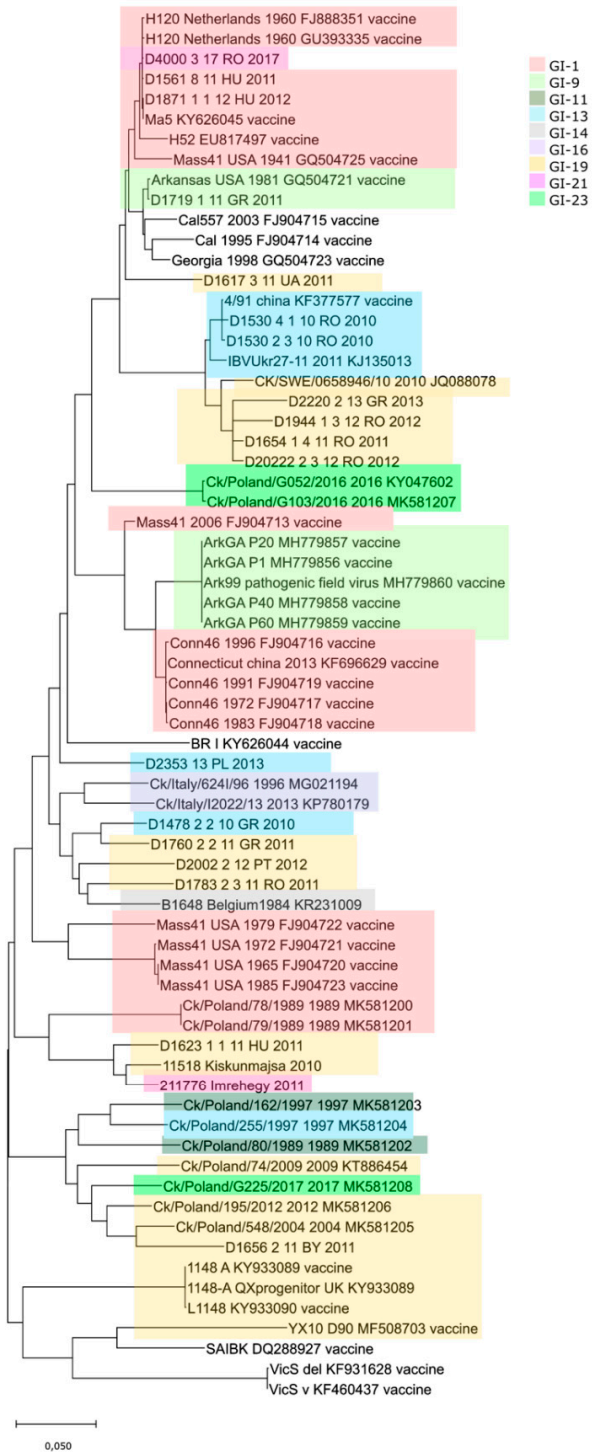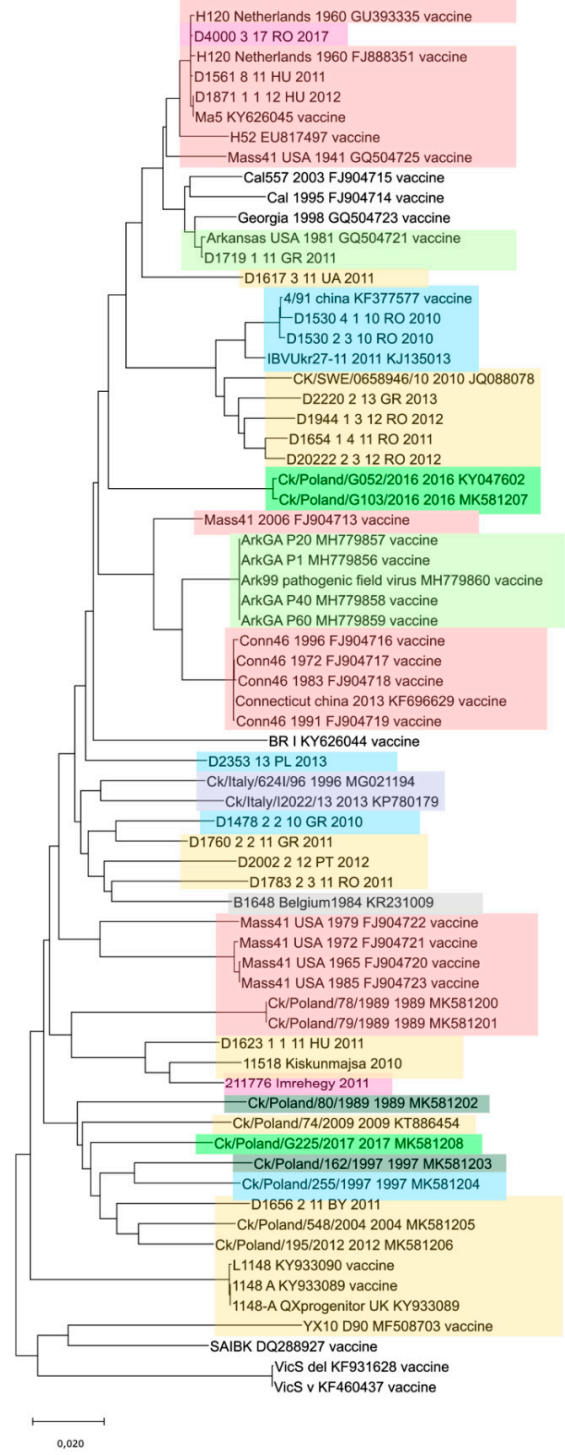

# ORF 1b

ML

NJ

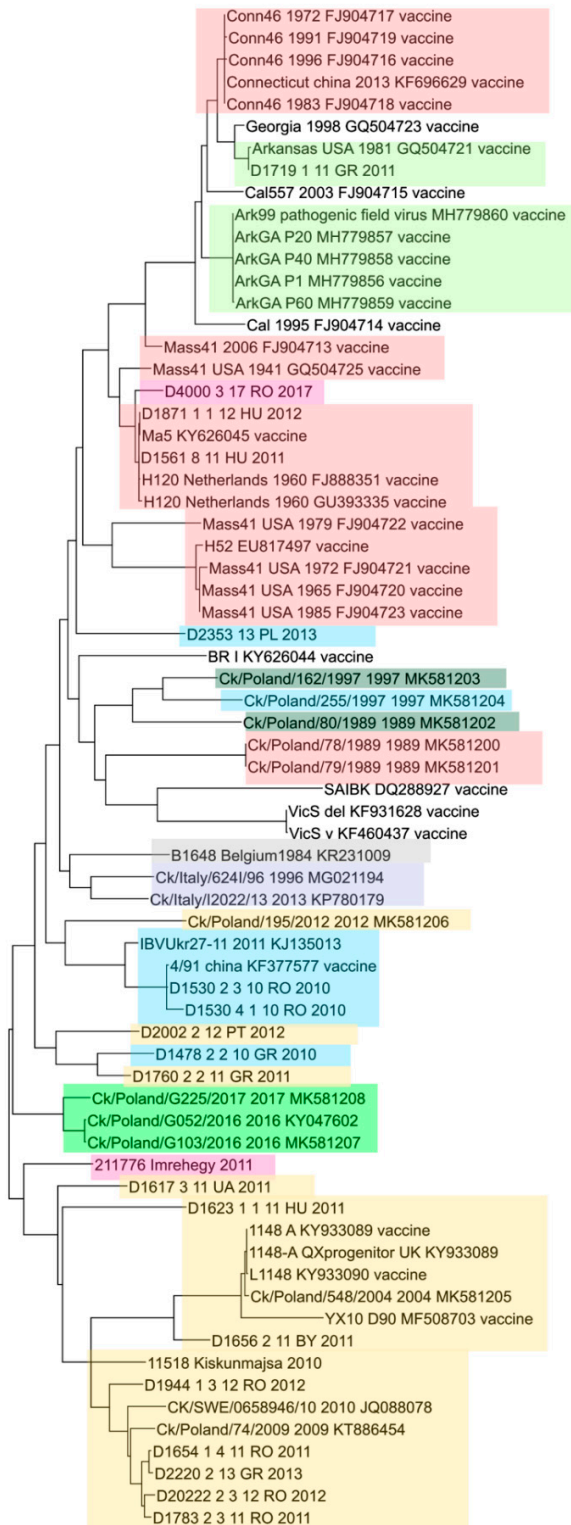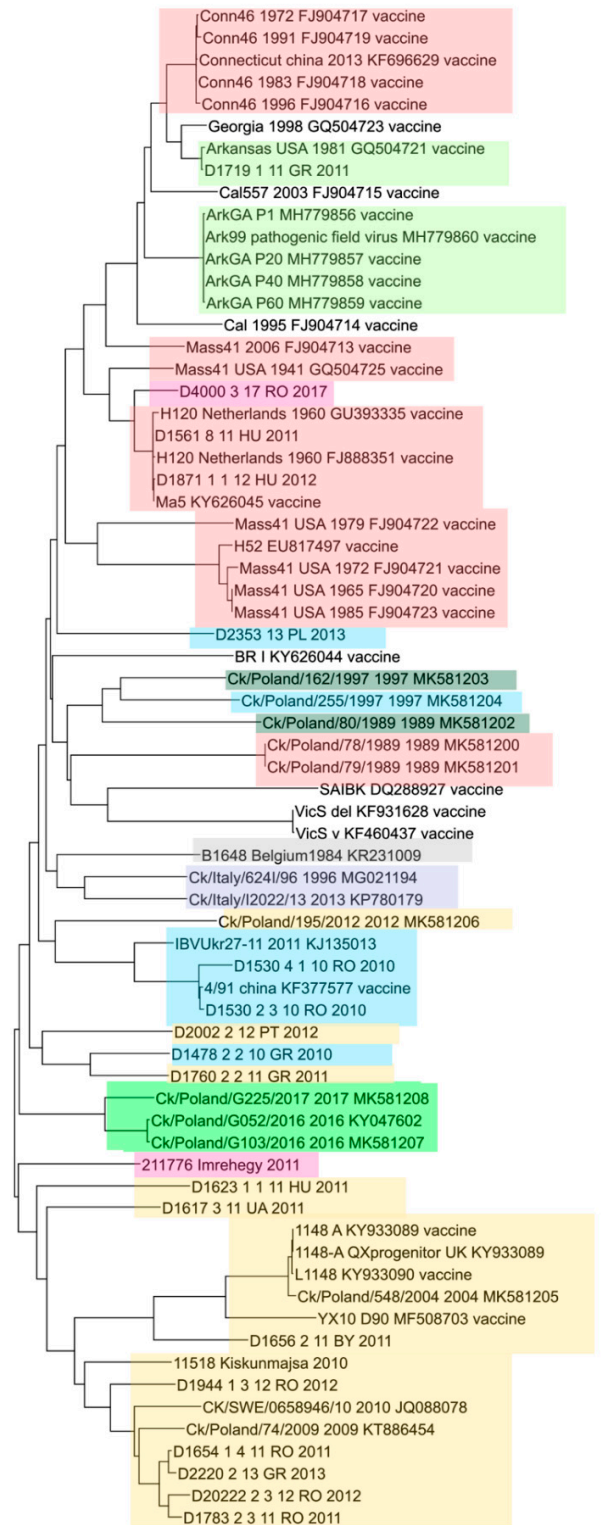

ORF 3a

ML

NJ

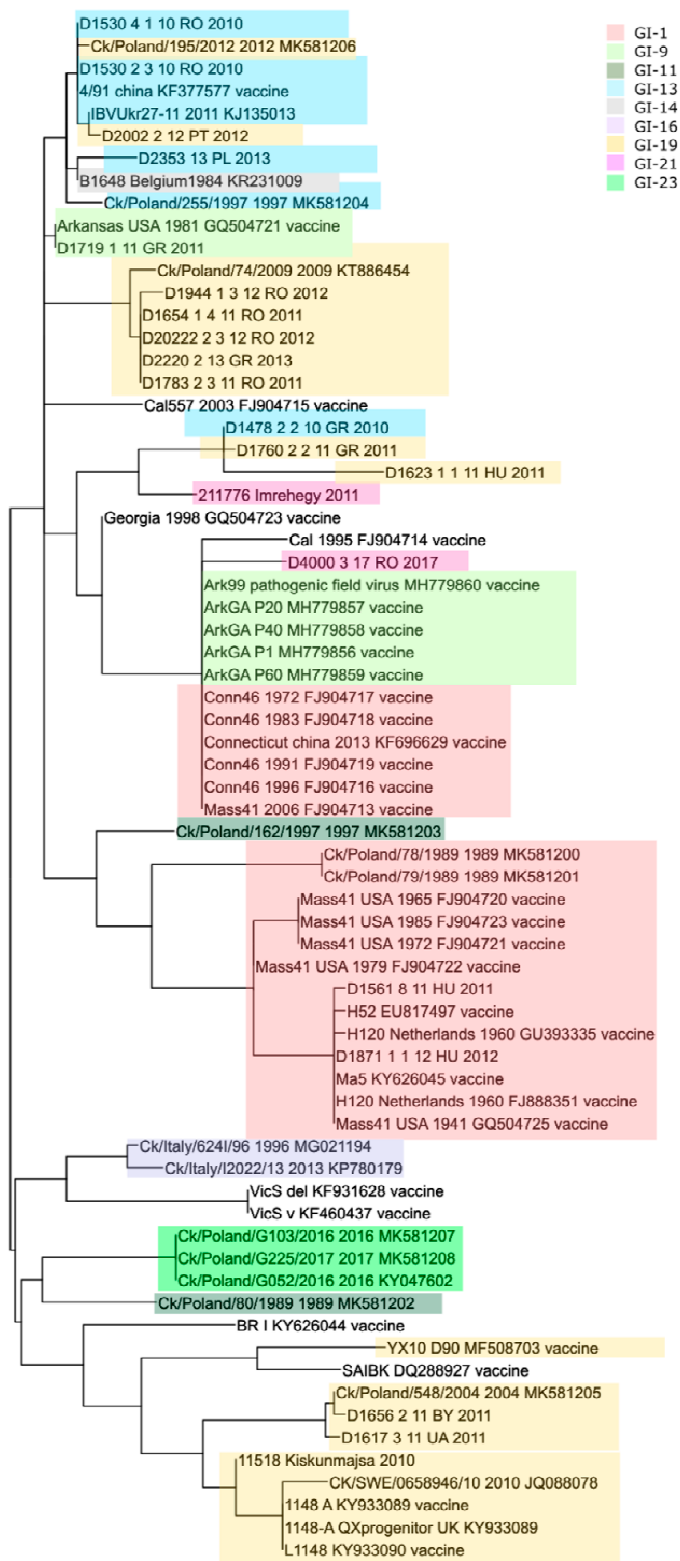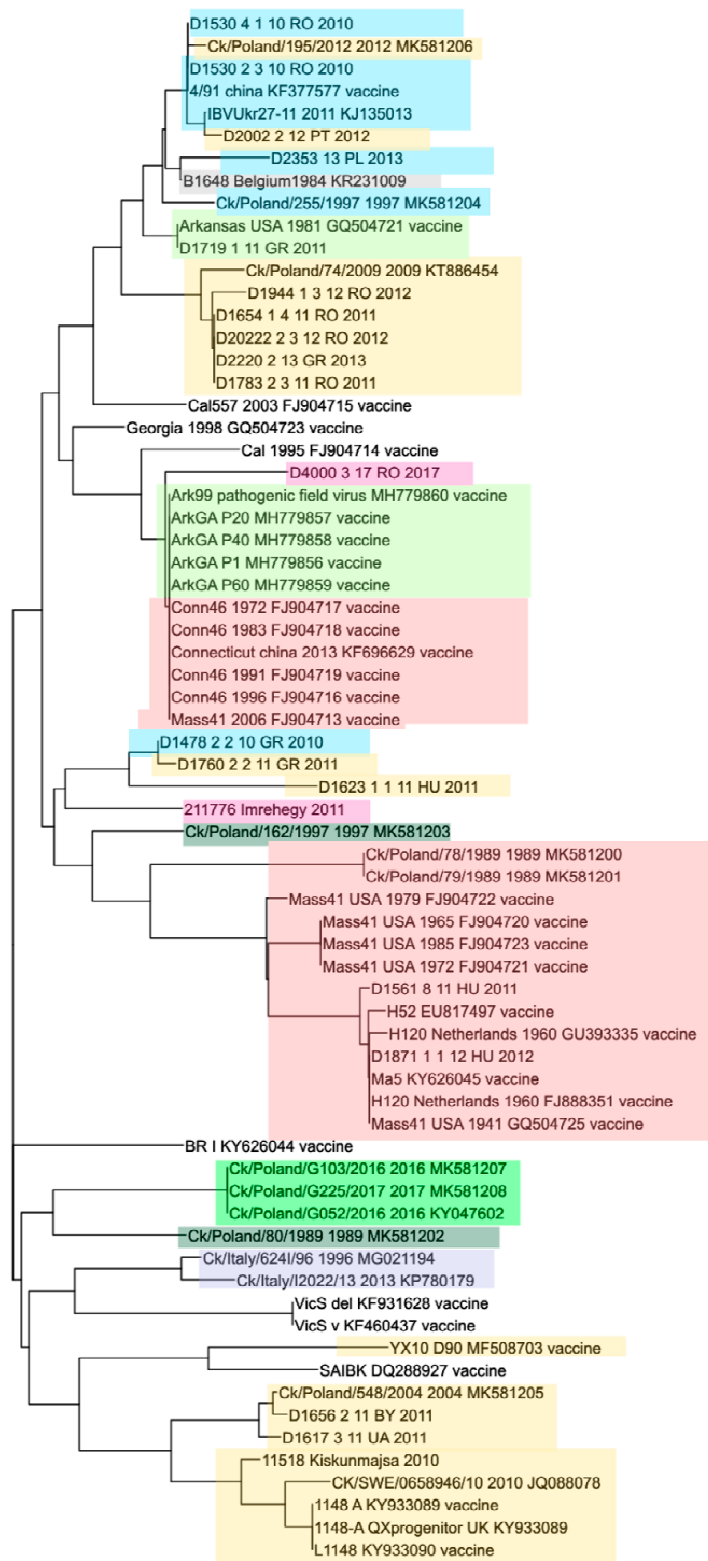



ORF 3b

ML

NJ

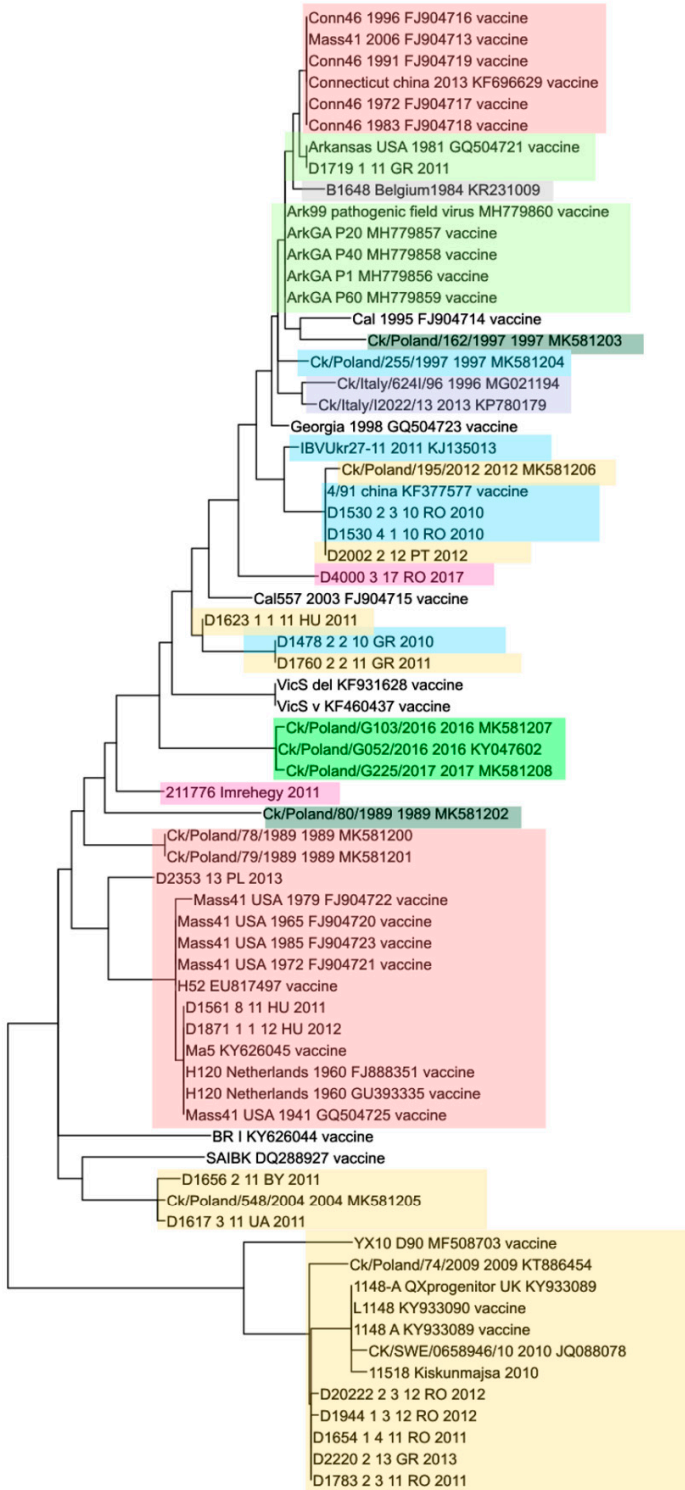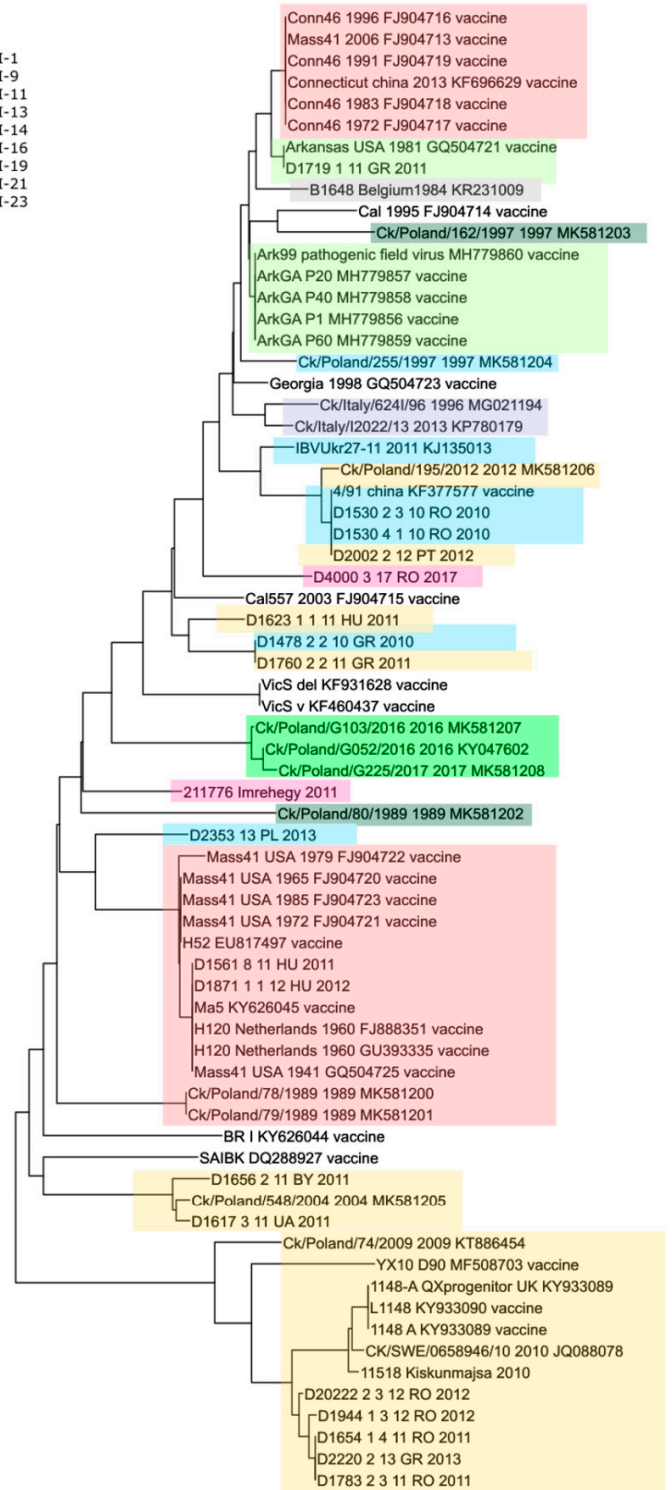



# ORF 3c (envelope protein coding gene)

ML

NJ

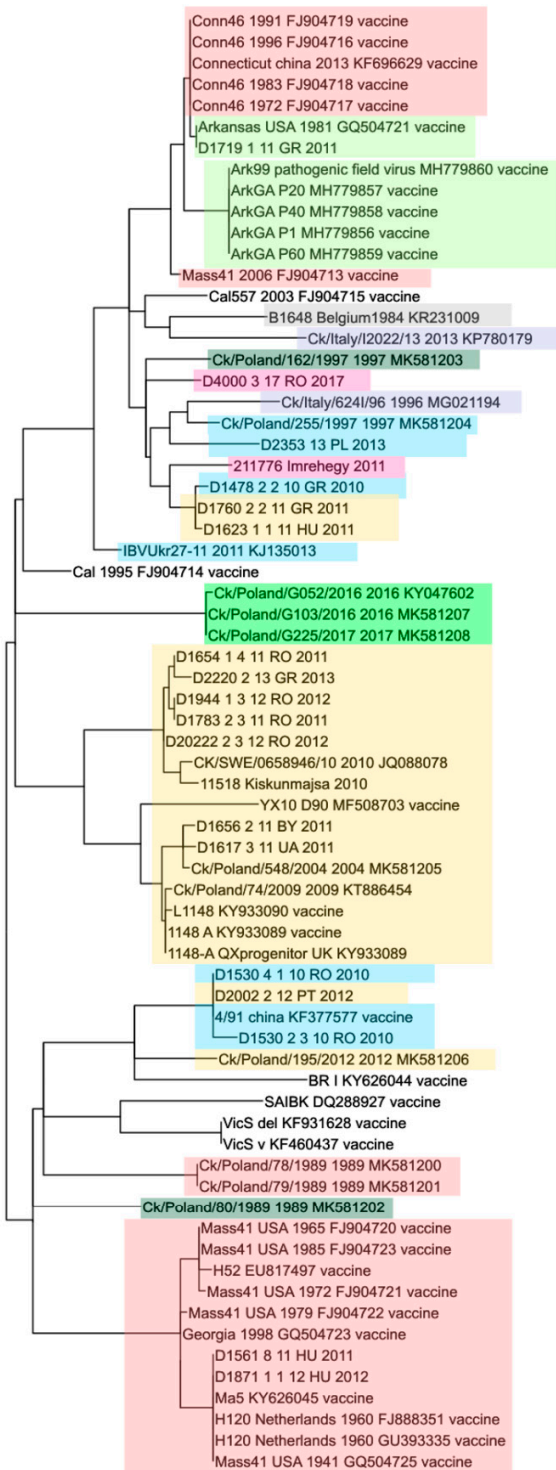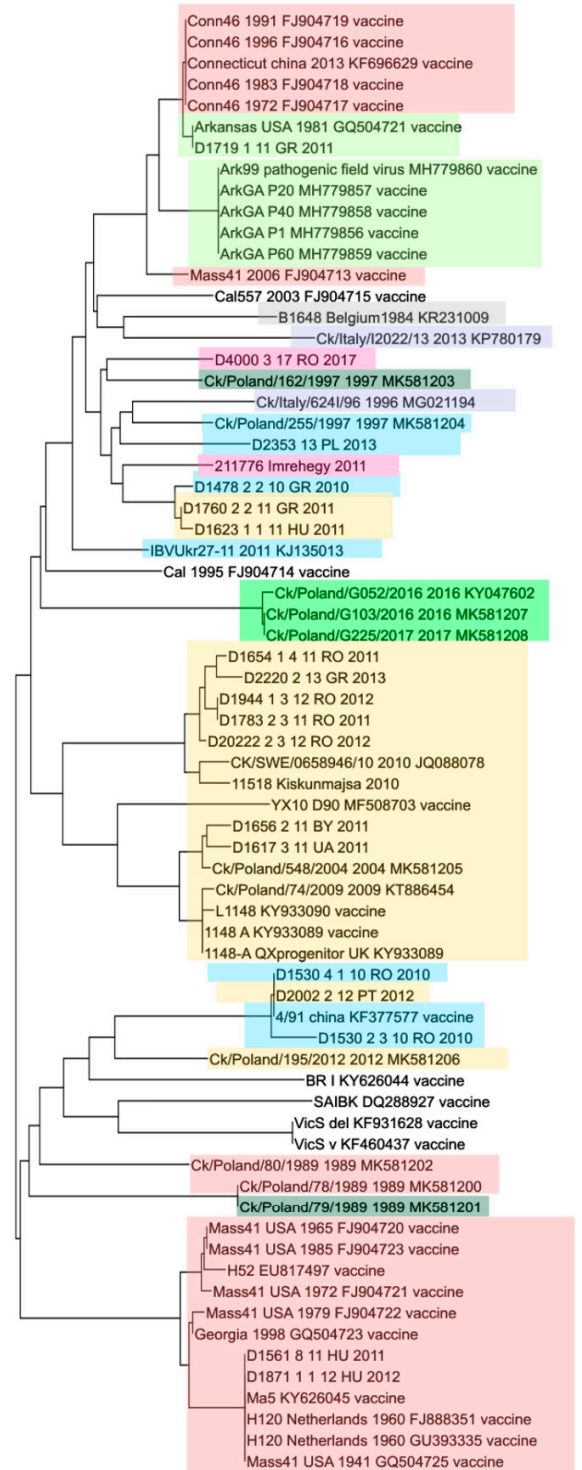

# ORF 4a (membrane protein coding gene)

ML

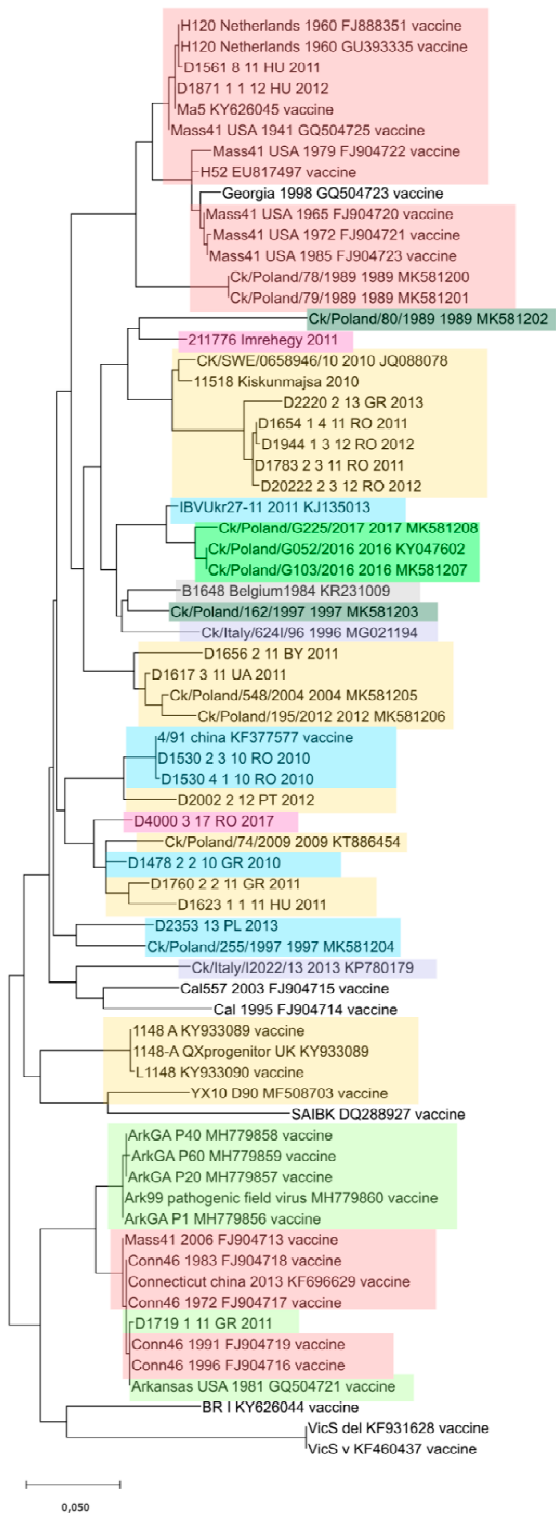

NJ

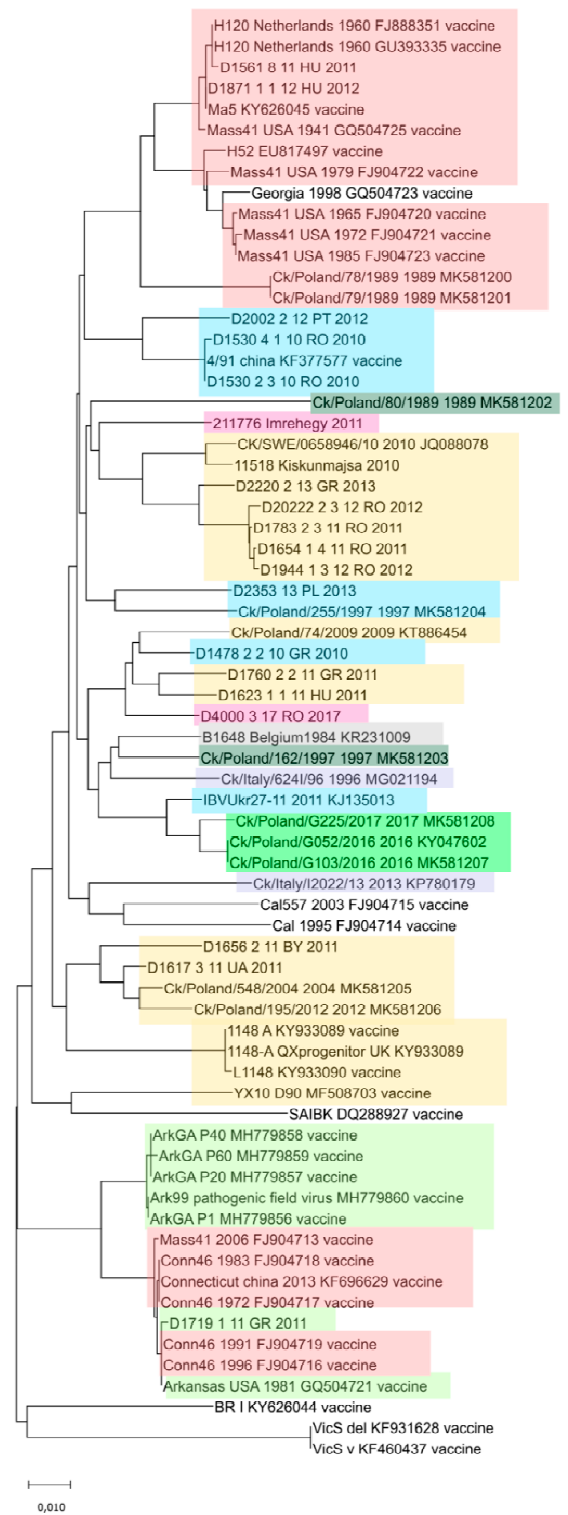

# ORF 4b

ML

NJ

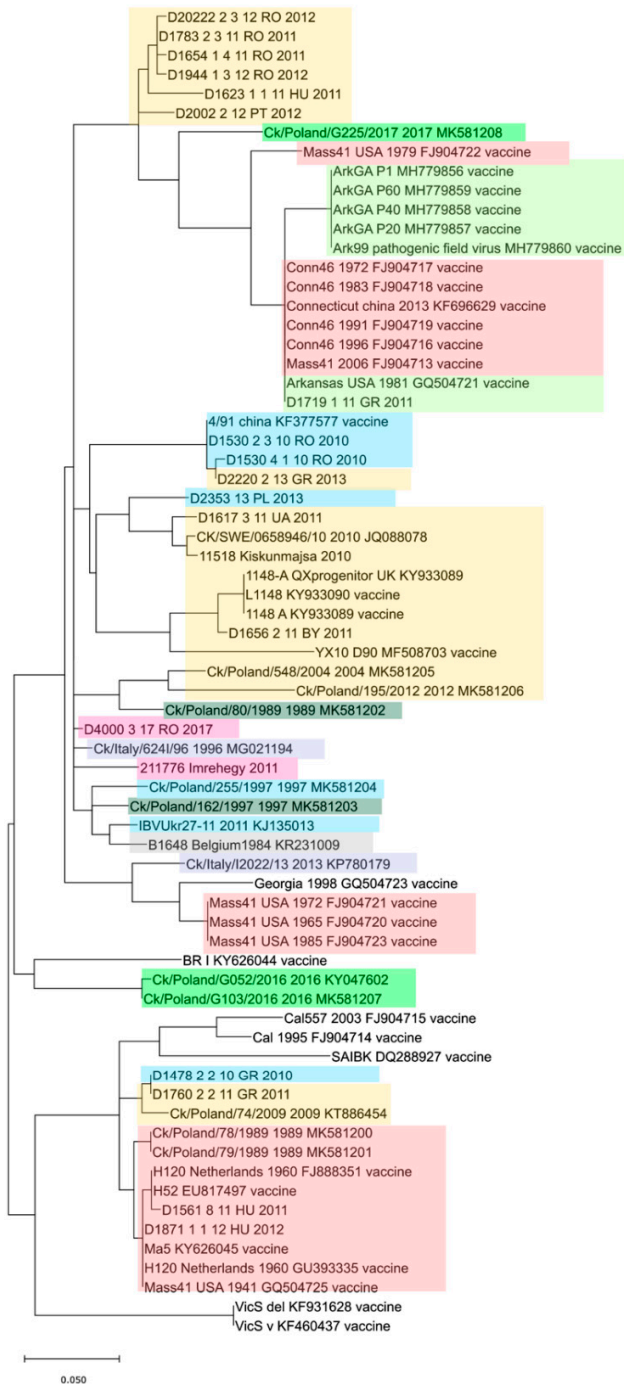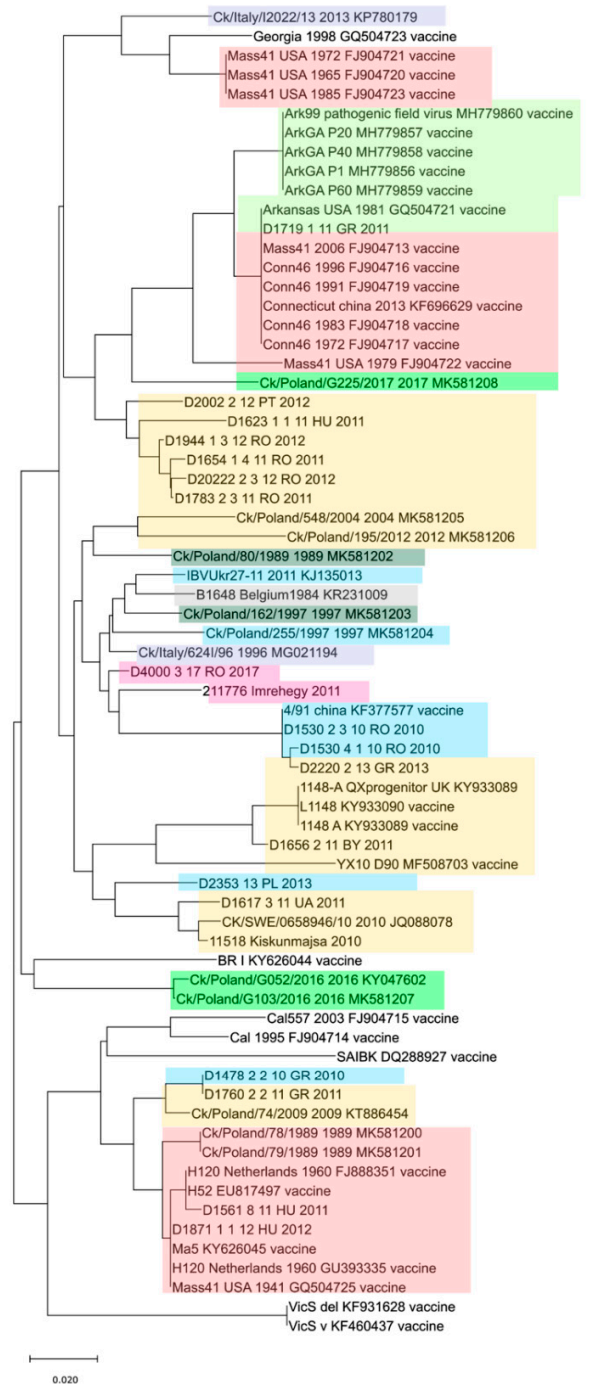



# ORF 4c

ML

NJ

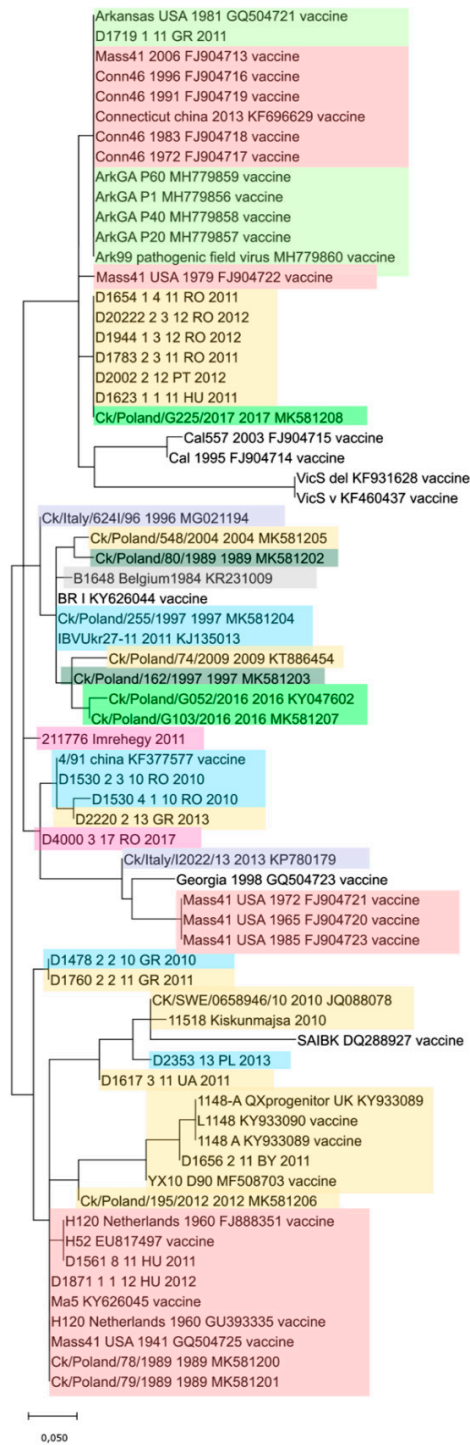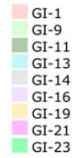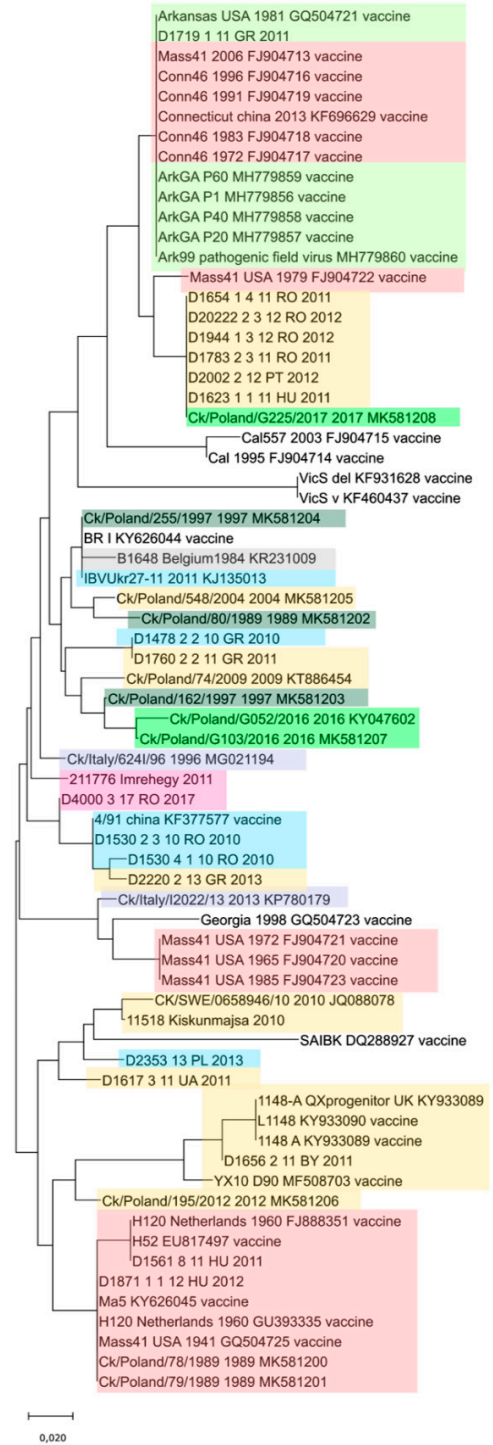

# ORF 5a

ML

NJ

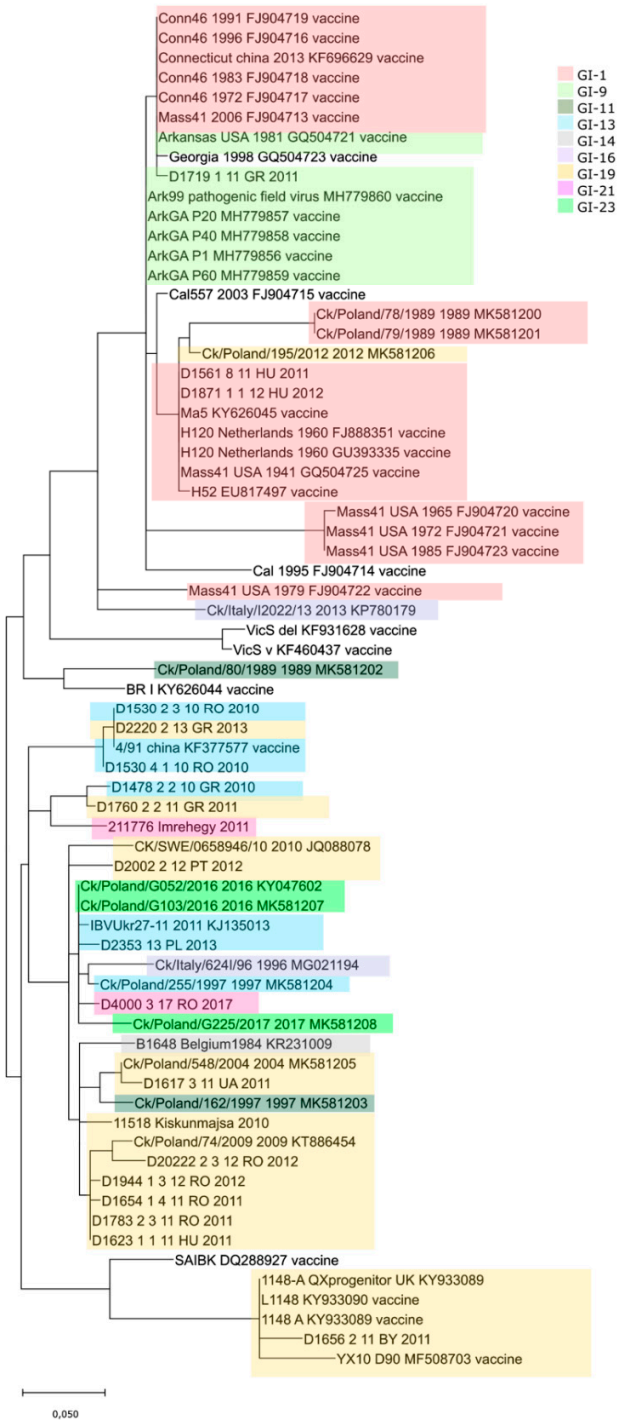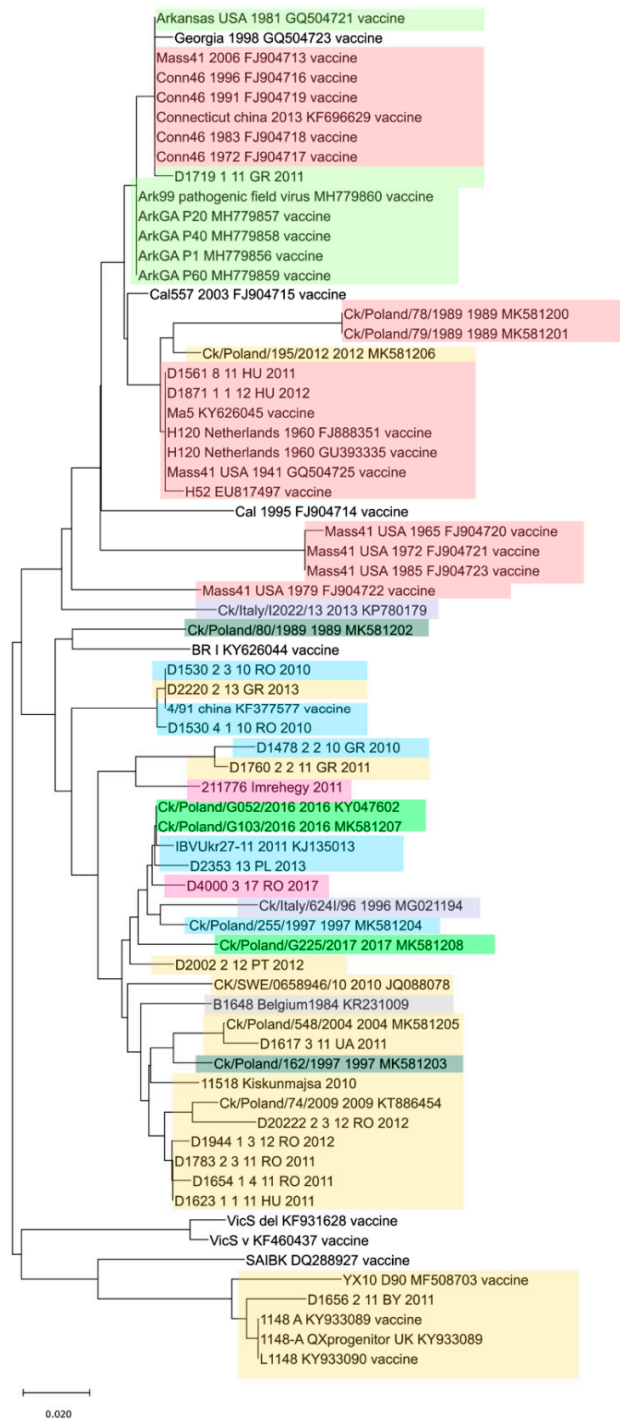

# ORF 5b

ML

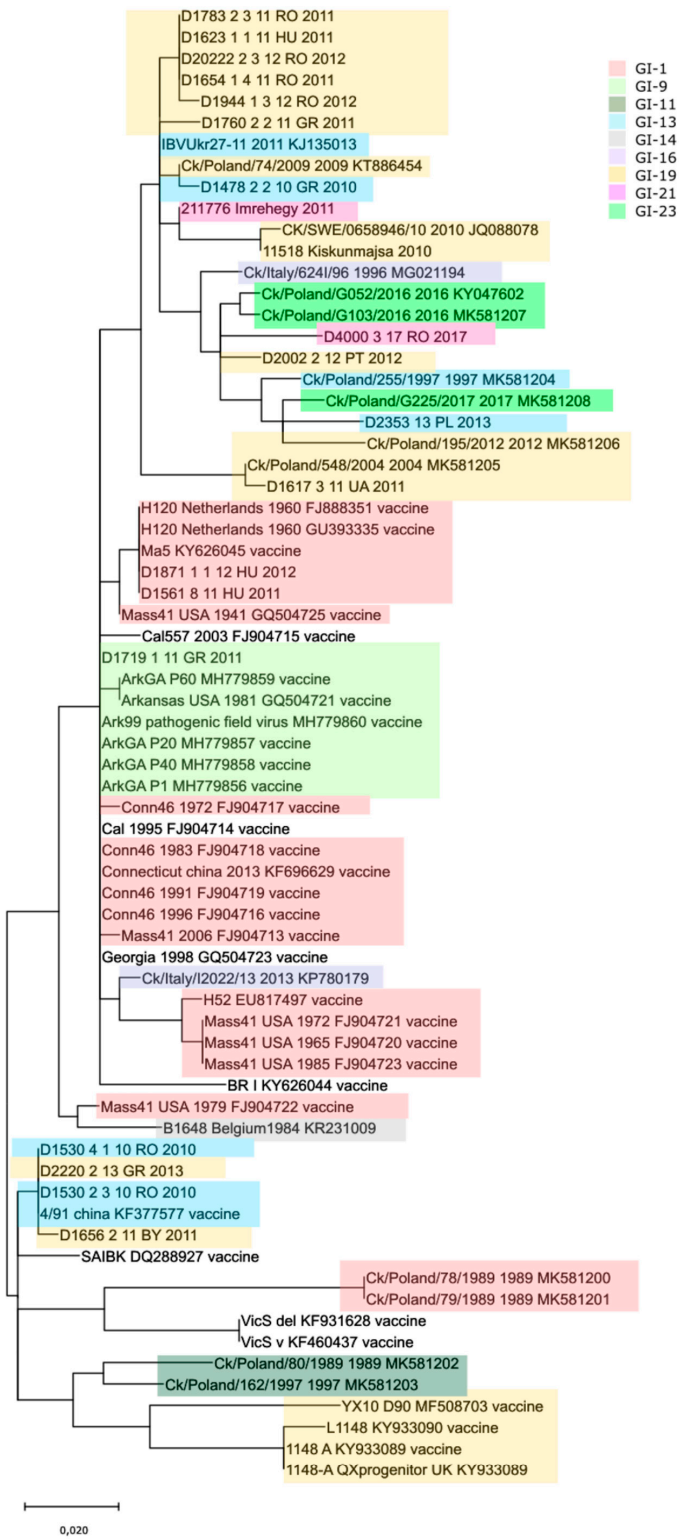

NJ

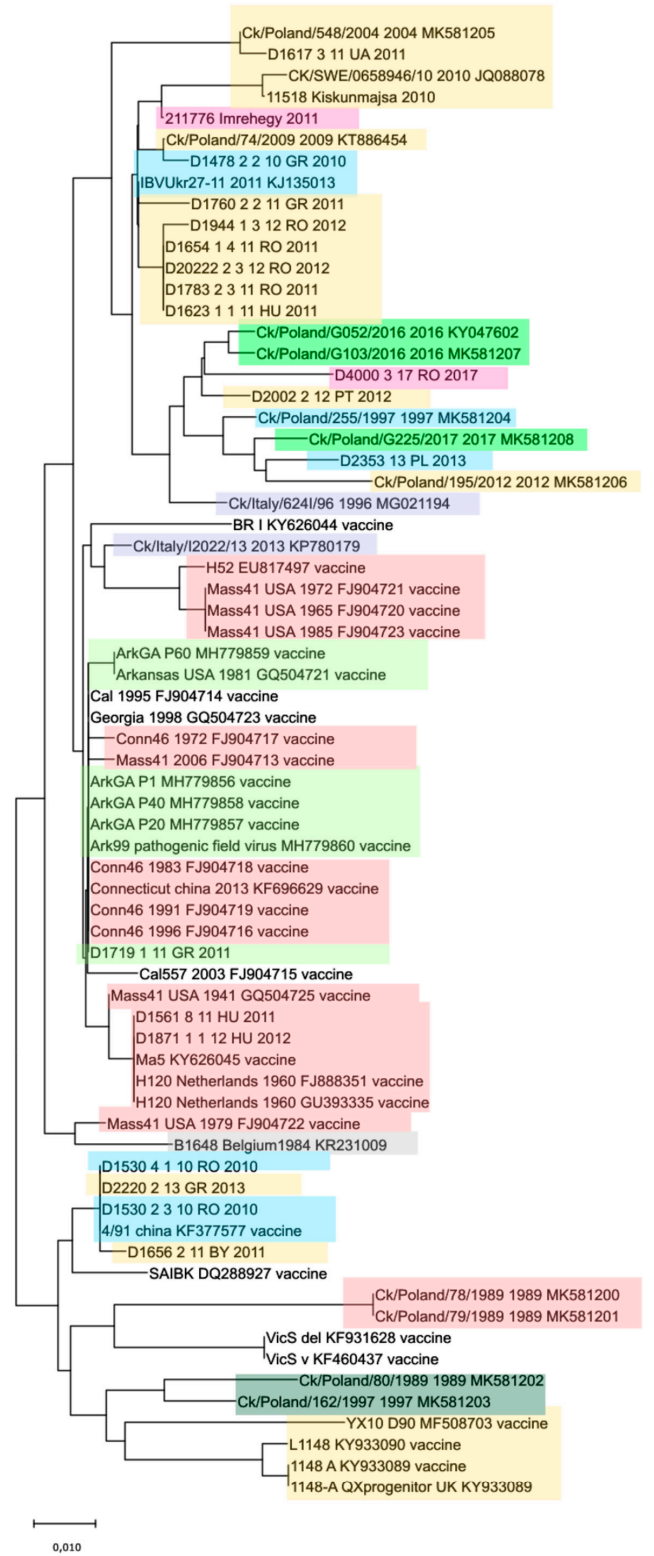



Nucleocapsid protein coding gene

ML

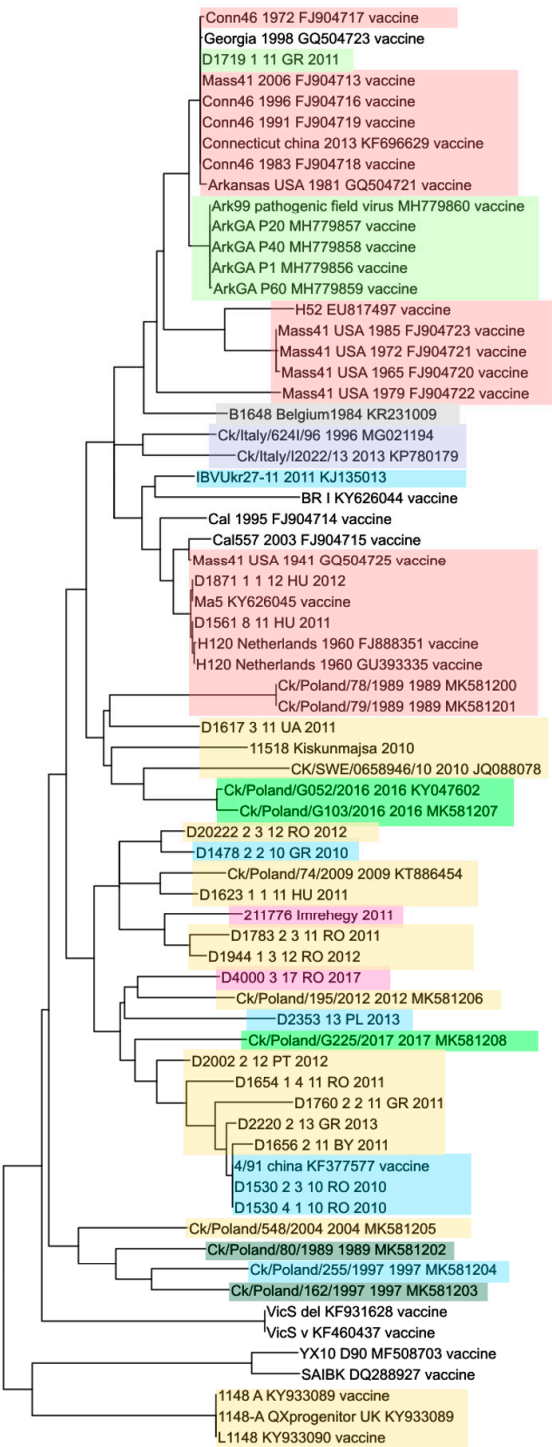

NJ

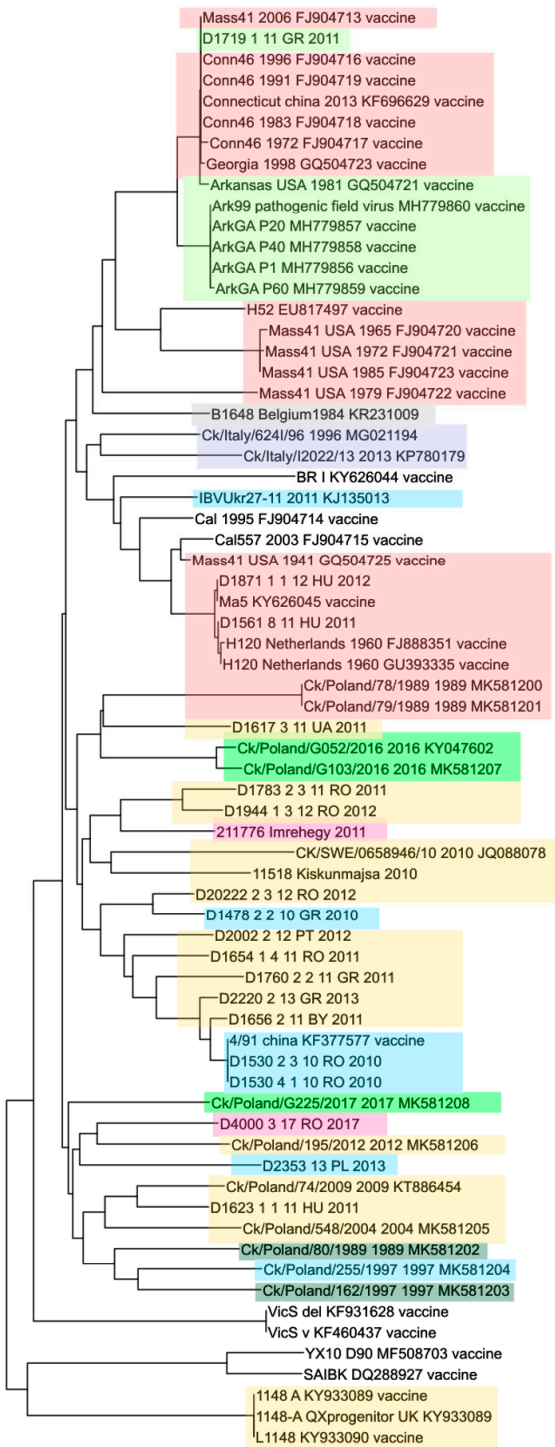

## S1 gene

ML

NJ

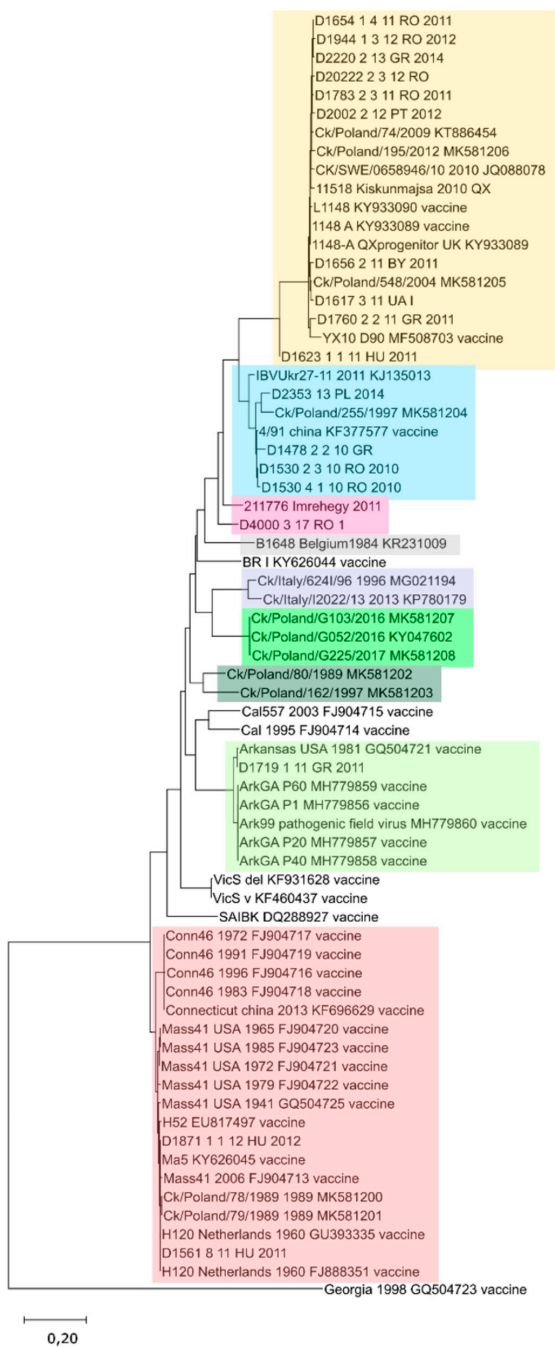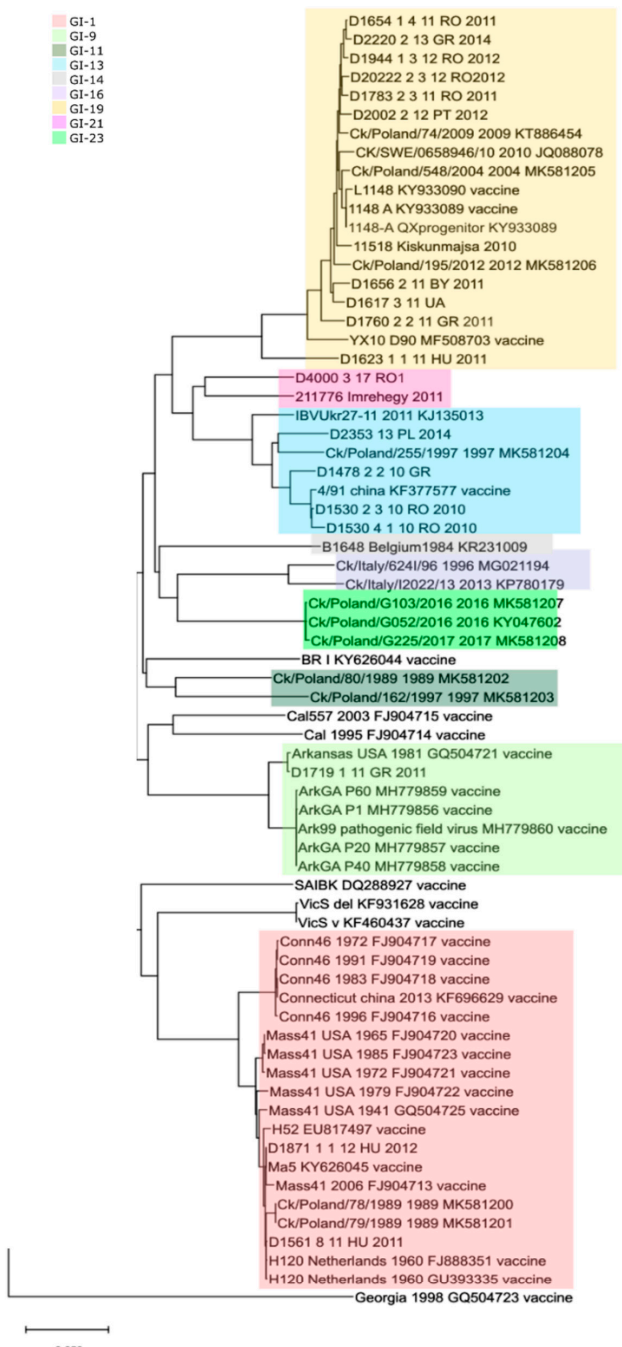

# Whole genome

ML

NJ

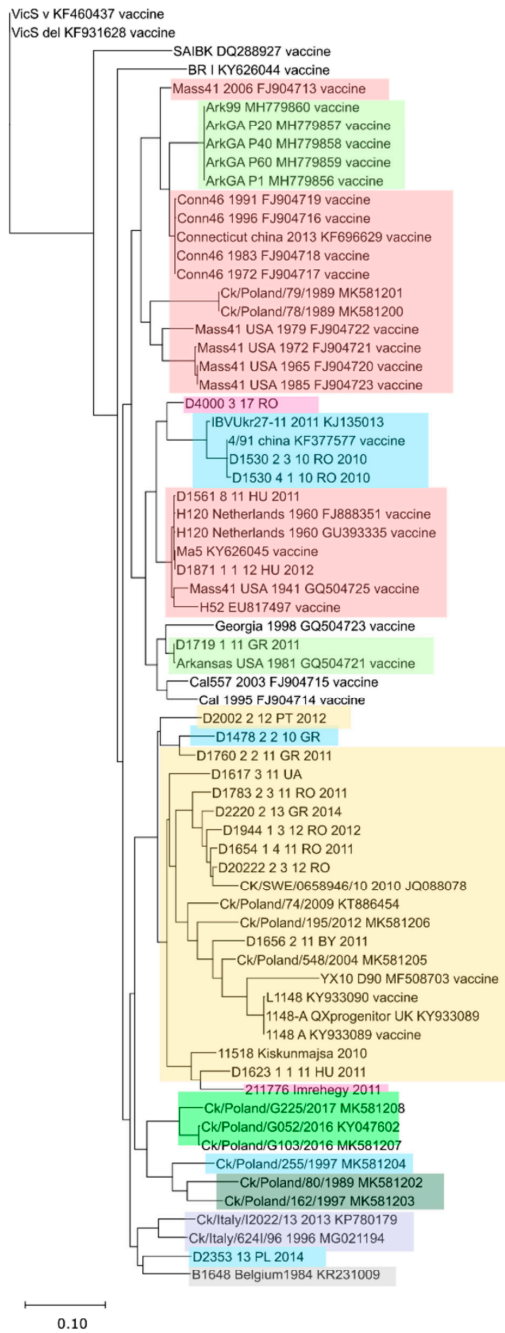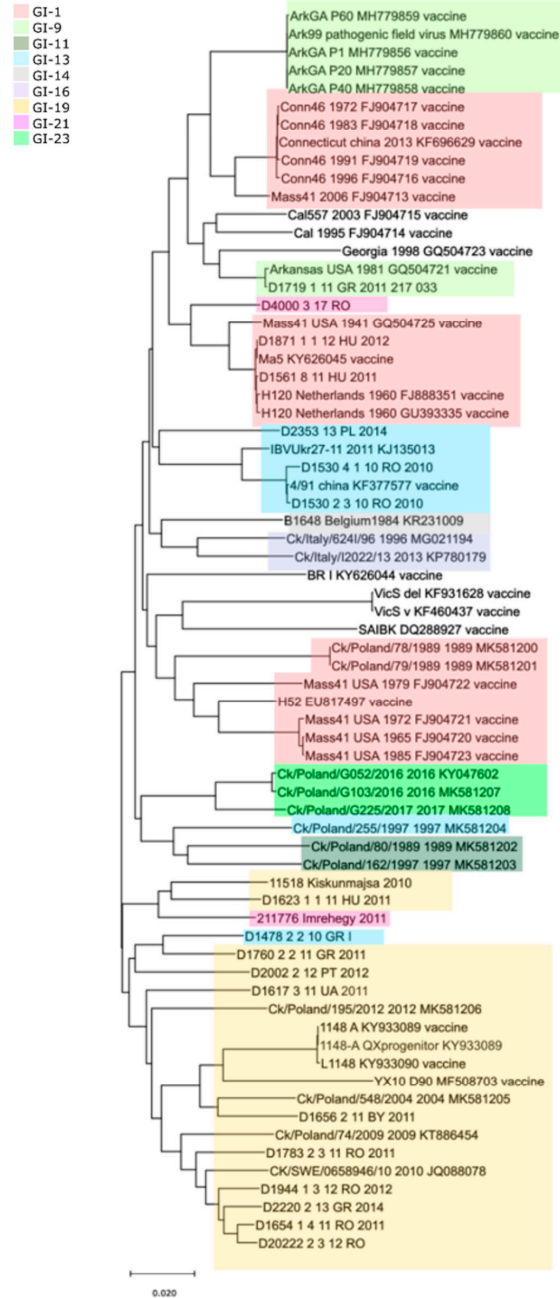

Supplement: s1 [file s1]
