# Supplementary figures and images for: Recombination Events Shape the Genomic Evolution of Infectious Bronchitis Virus in Europe
Source: MDPI journal article supplement (doi:10.3390/v13040535), 2021-03-24

GI-1

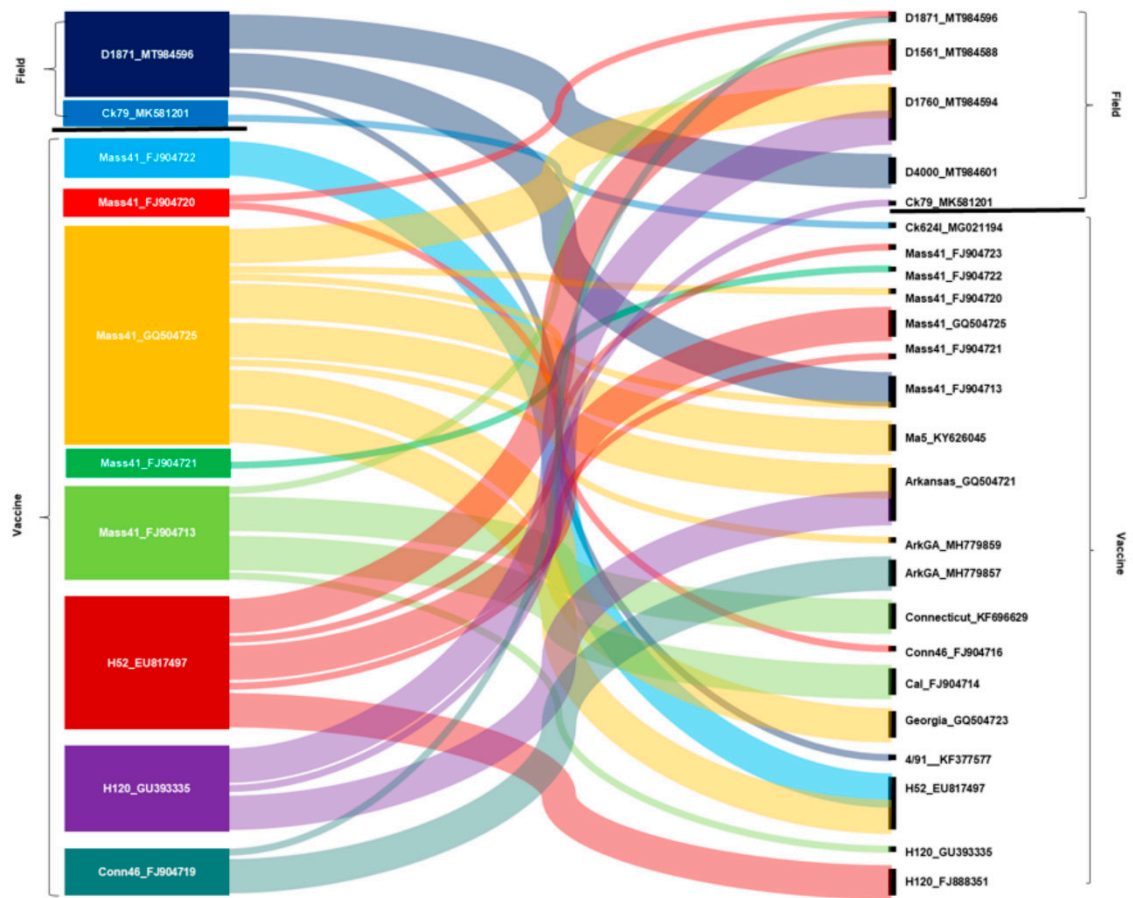

# GI-9

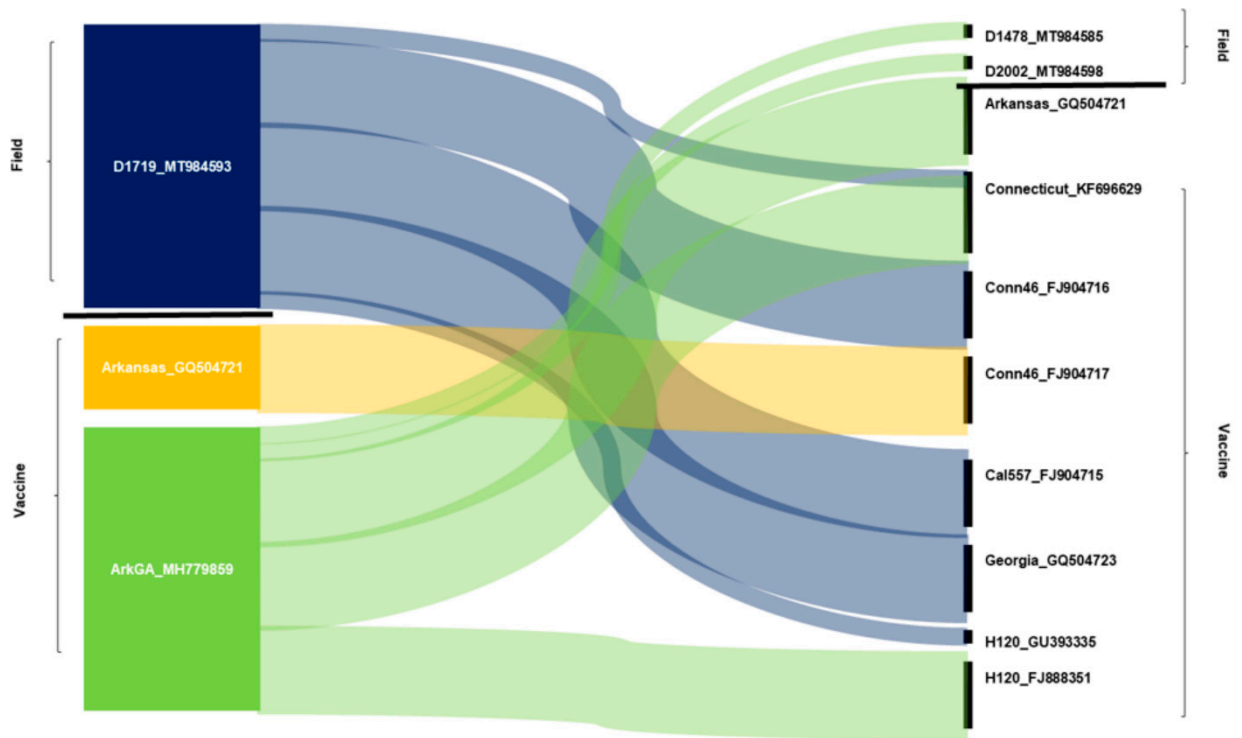

GI-11

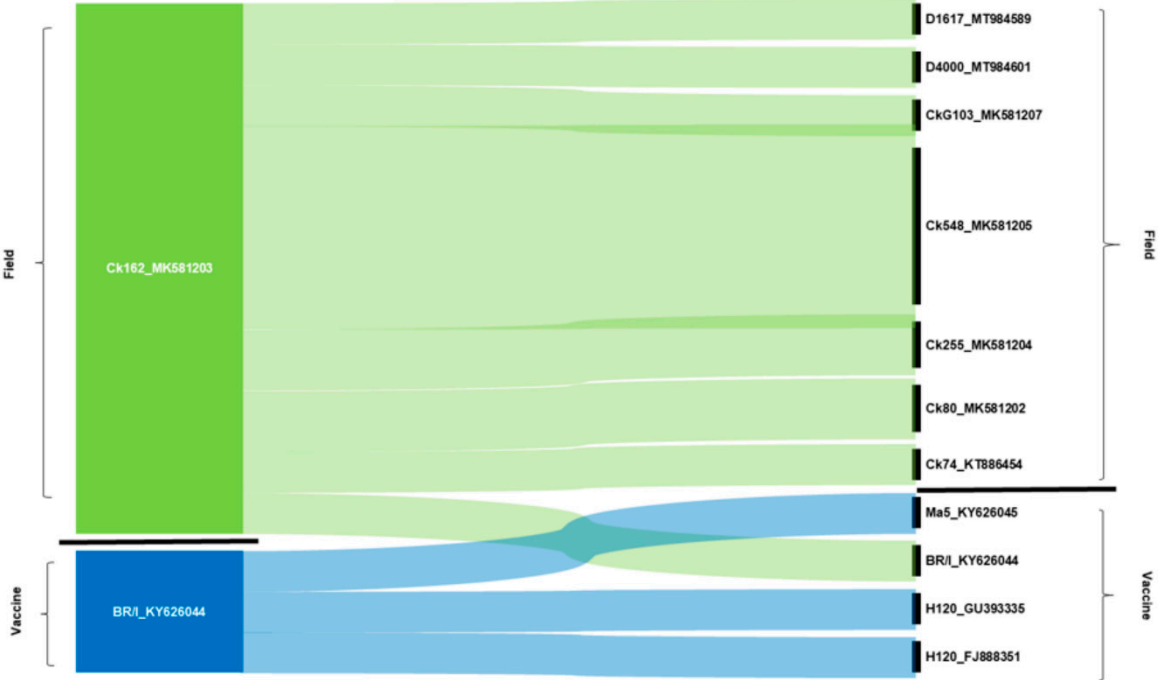

GI-13

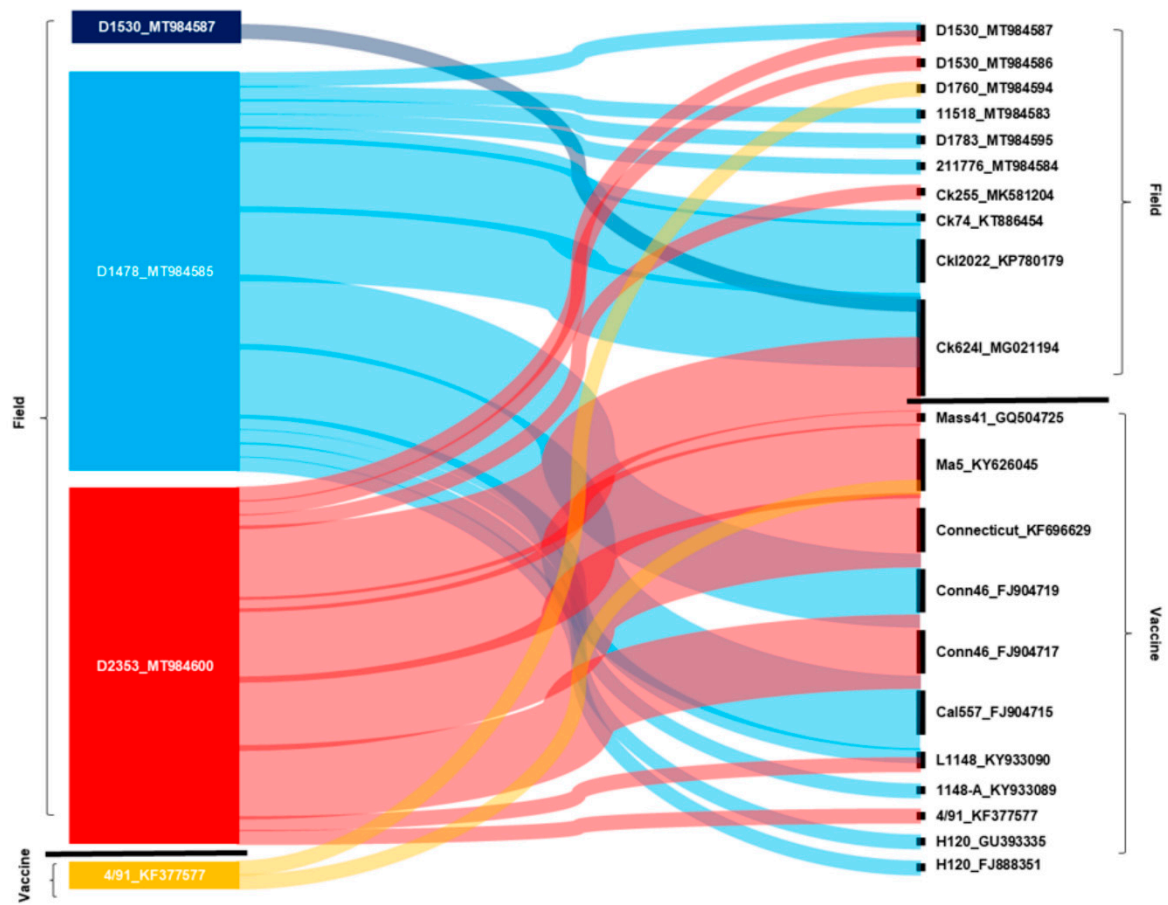

# GI-16

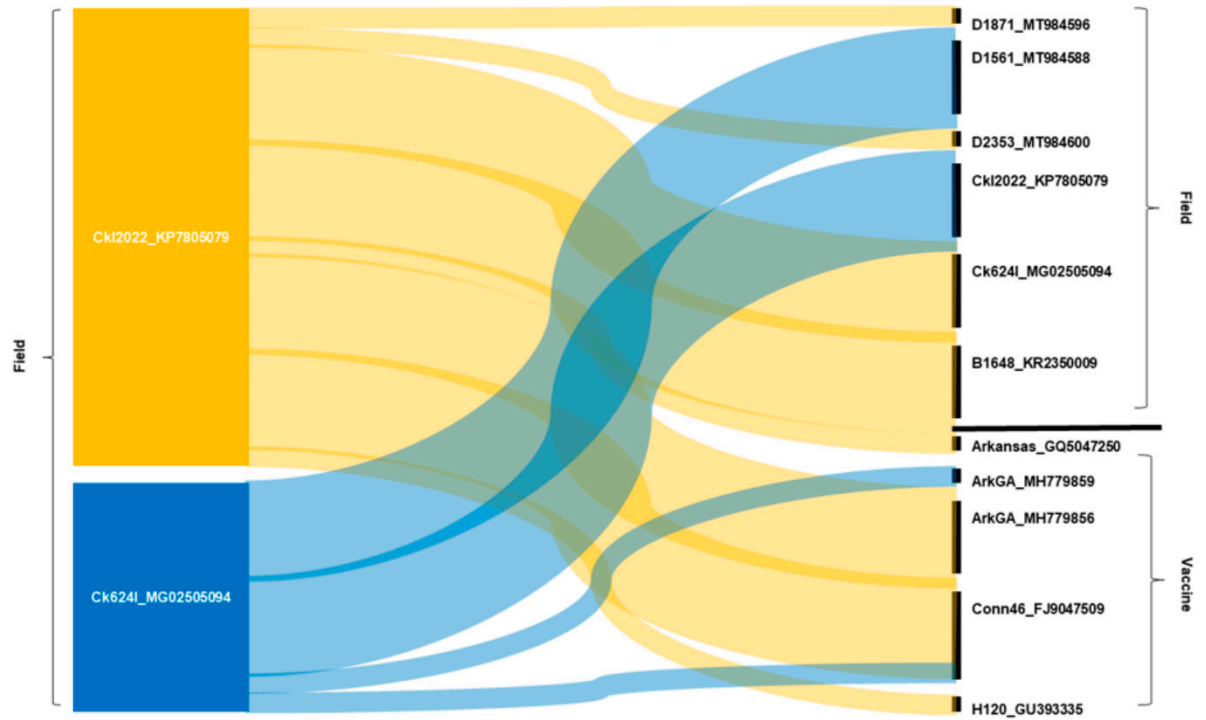

# GI-19

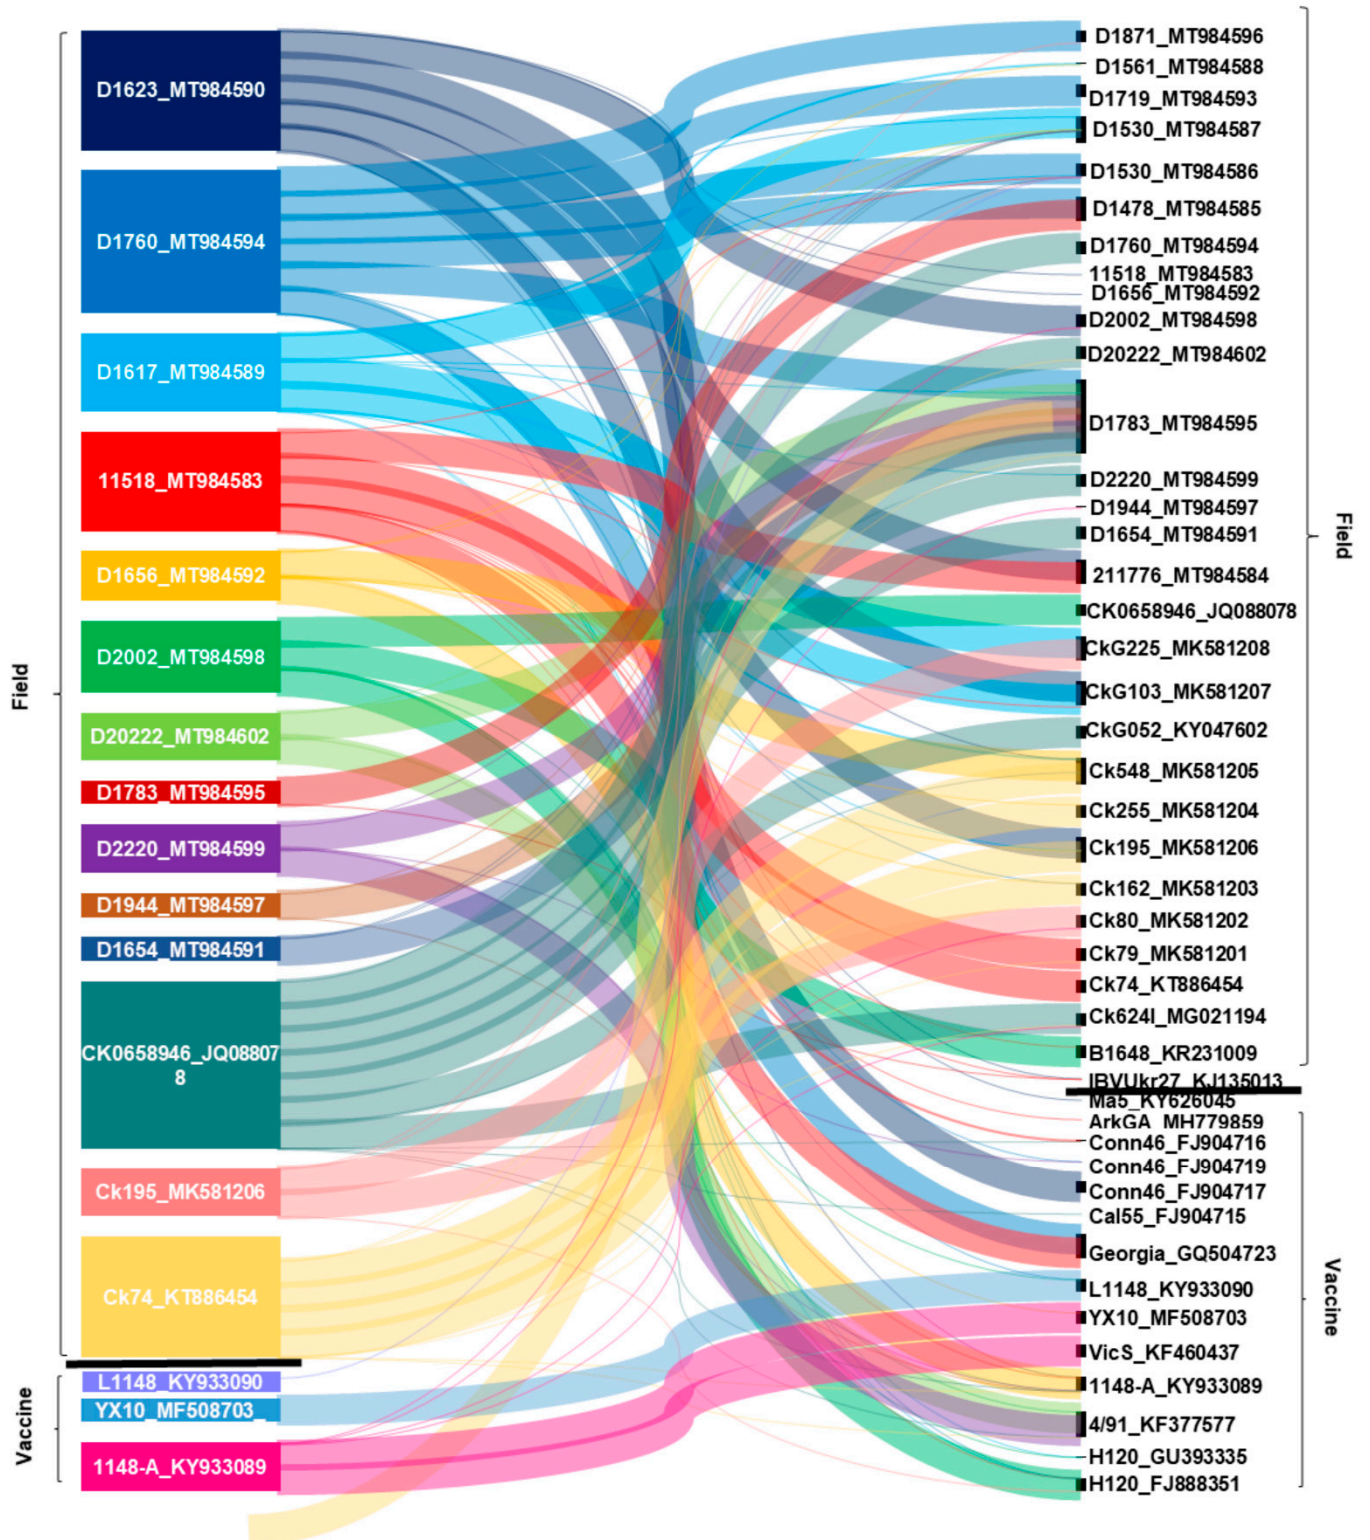



GI-21

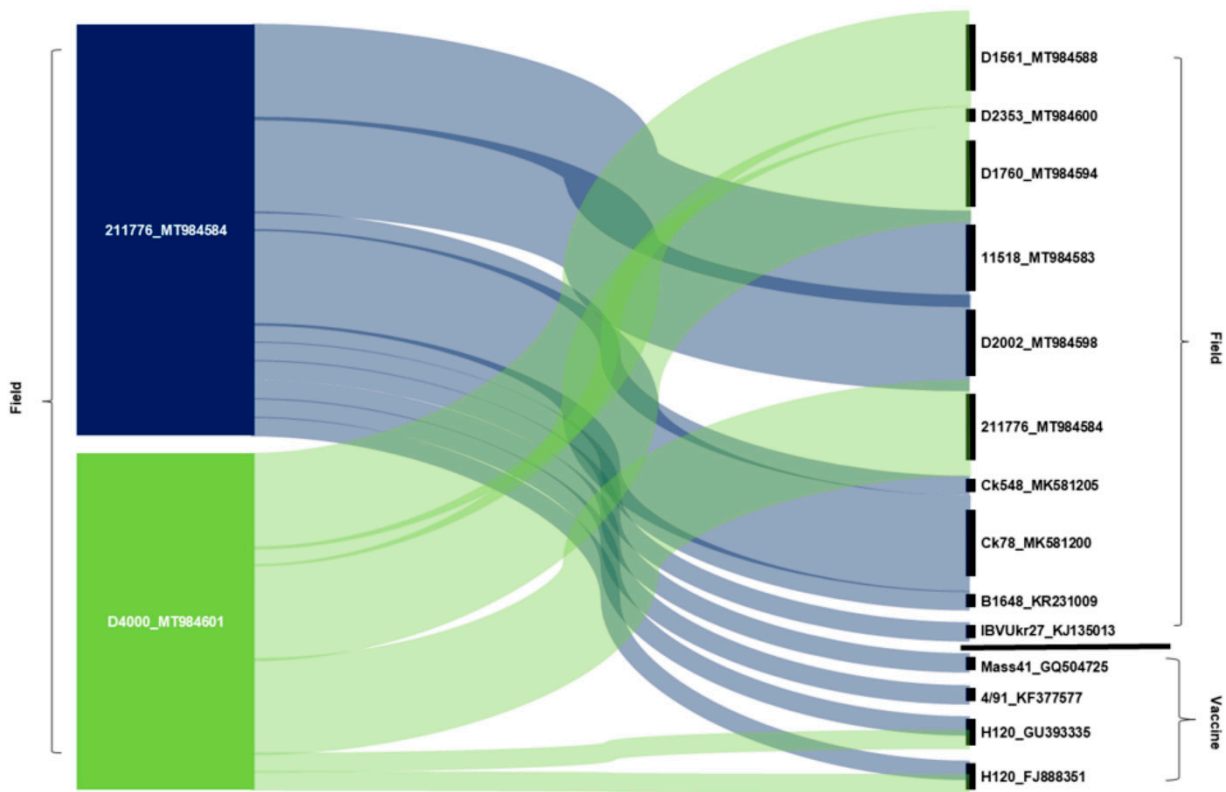

GI-23

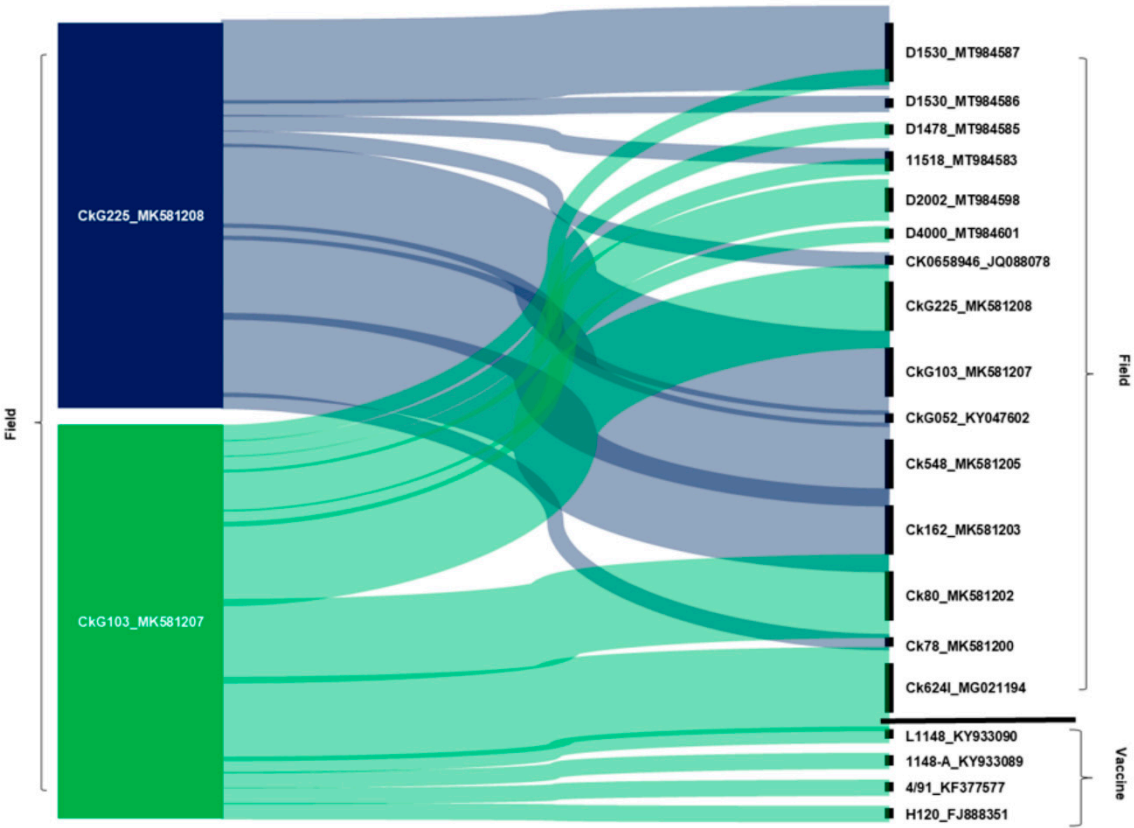

Supplement: s1 [file s1]
